# Supplementary material for: A facile and novel design of multifunctional electronic skin based on polydimethylsiloxane with micropillars for signal monitoring
Source: Royal Society of Chemistry journal article supplement (doi:10.1039/d0tb00954g), 2020-01-01
Supplement: d0tb00954g1.pdf [file d0tb00954g1.pdf]

## Supplementary Information

### **A Facile and Novel Design of Multifunctional Electronic Skin Based on Polydimethylsiloxane with Micropillars for Signal Monitoring**

Songyue Zhang<sup>a</sup>, Chuanchuan Lin<sup>a</sup>, Zengzilu Xia<sup>a,\*</sup>, Maowen Chen<sup>a</sup>, Yile Jiaa, Bailong Tao<sup>a</sup>, Shunbo Li<sup>b</sup>, Kaiyong Cai<sup>a,\*</sup>

<sup>a</sup> Key Laboratory of Biorheological Science and Technology, Ministry of Education, College of Bioengineering, Chongqing University, Chongqing, 400044, China.

<sup>b</sup>Key Laboratory of Optoelectronic Technology and Systems, Ministry of Education and Key Disciplines Laboratory of Novel Micro-Nano Devices and System Technology, School of Optoelectronics Engineering, Chongqing University, Chongqing 400044, China.

\*Corresponding author : Dr. Zengzilu Xia and Dr. Kaiyong Cai

E-mail: zxlxia@cqu.edu.cn, kaiyong\_cai@cqu.edu.cn

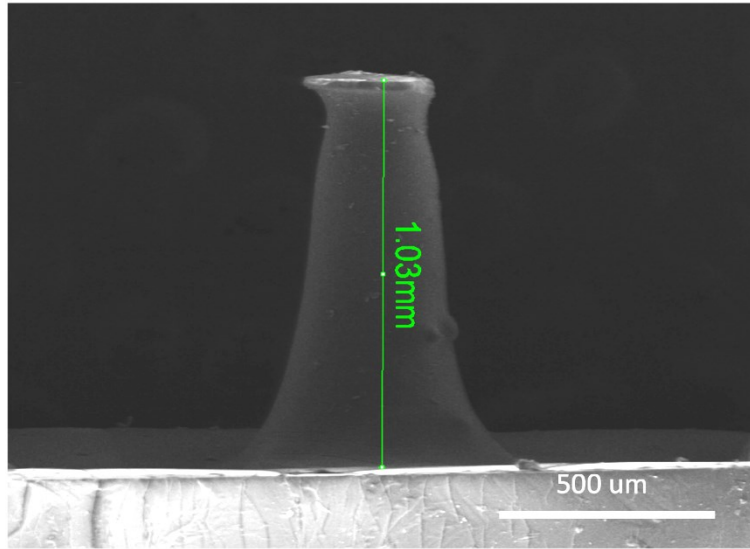

**Fig. S1** The cross-sectional SEM image of a micropillar.

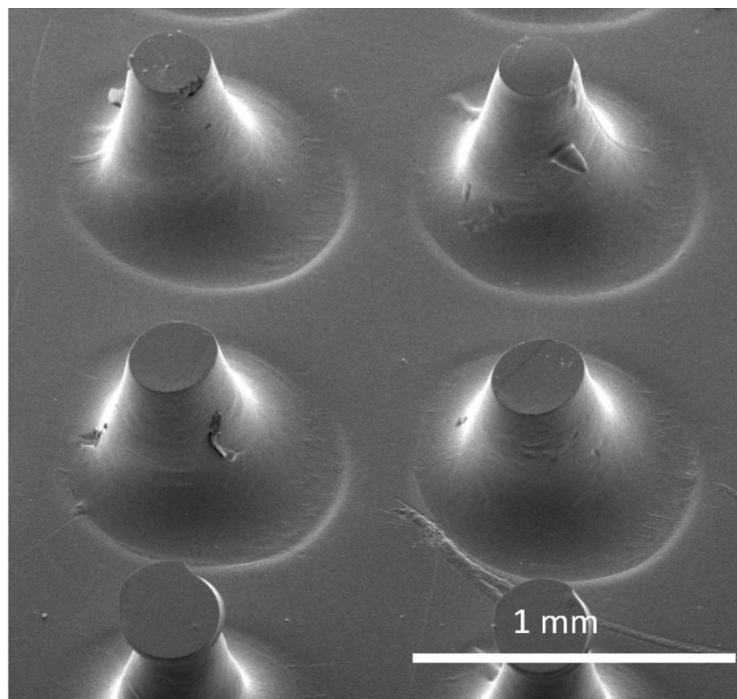

**Fig. S2** The 5-angle top-view SEM image of the micropillars.

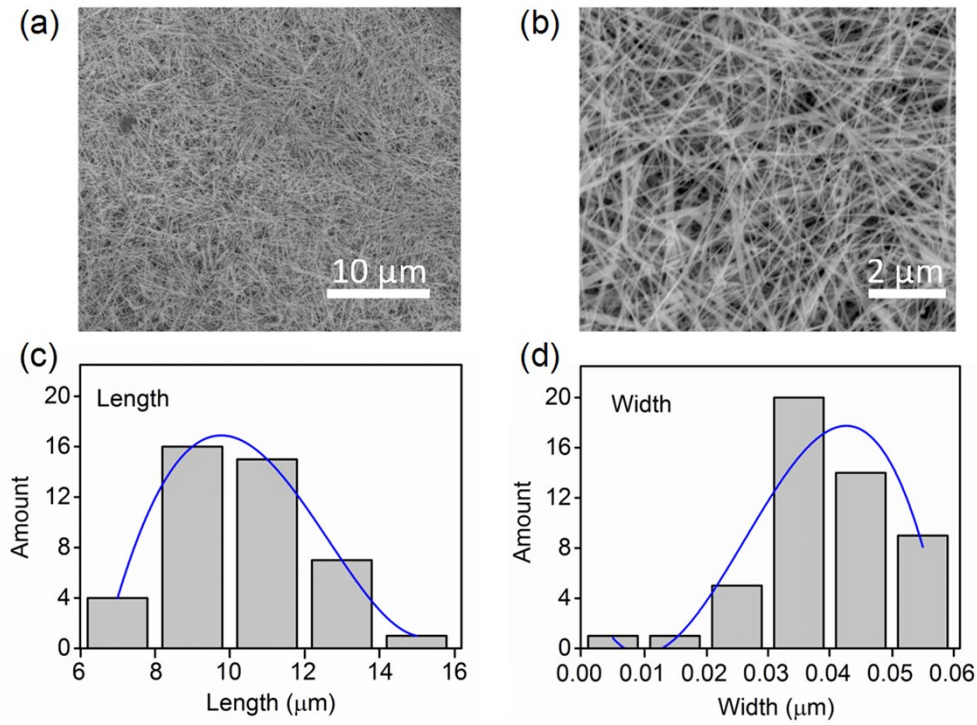

**Fig. S3** SEM images of AgNWs with larger scales as (a) scale bar 10 μm and (b) scale bar 2 μm. The nonlinear fitting distribution curves of (c) length and (d) width values of AgNWs.

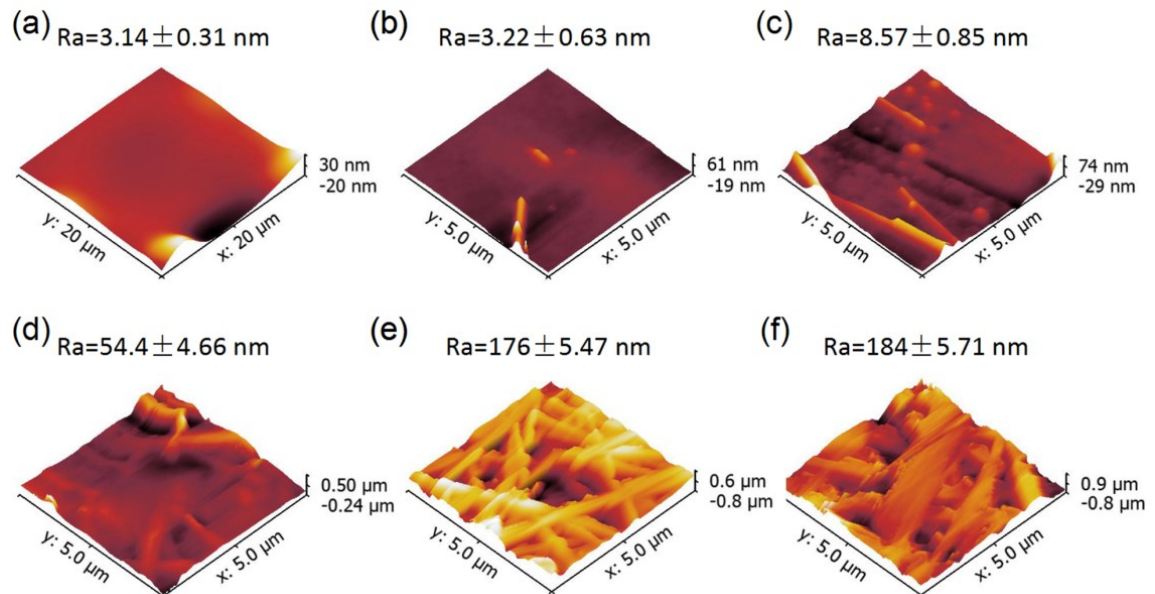

**Fig. S4** AFM images of (a) plain PDMS and PDMS coated with (b) 1 layer, (c) 2 layers, (d) 3 layers, (e) 4 layers, and (f) 5 layers of AgNWs.

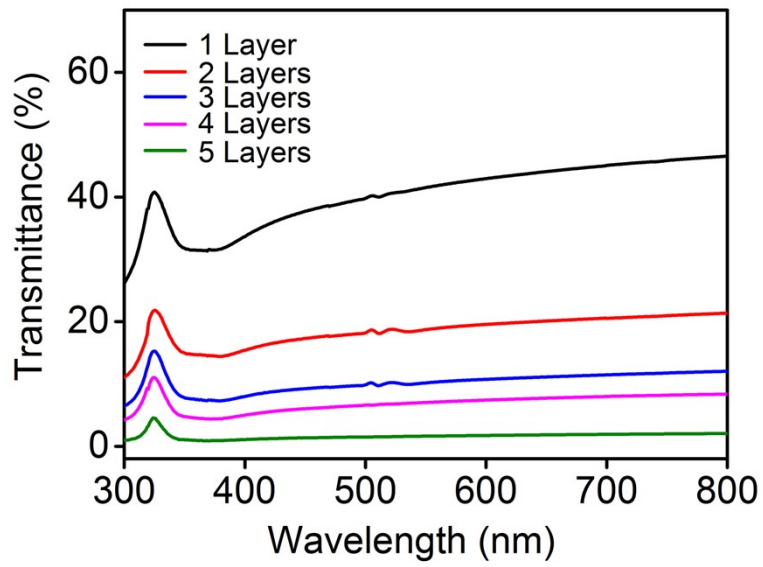

**Fig. S5** The optical transmittances of substrates with various layers of AgNWs.

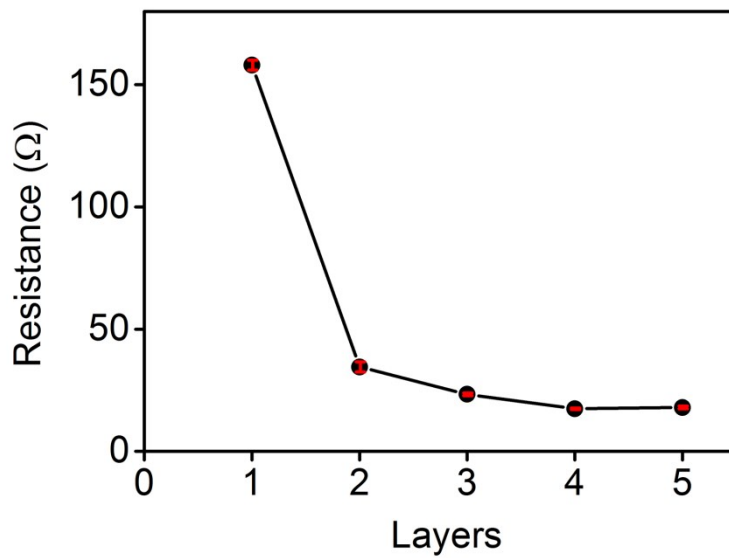

**Fig. S6** The resistances of substrates with various layers of AgNWs.

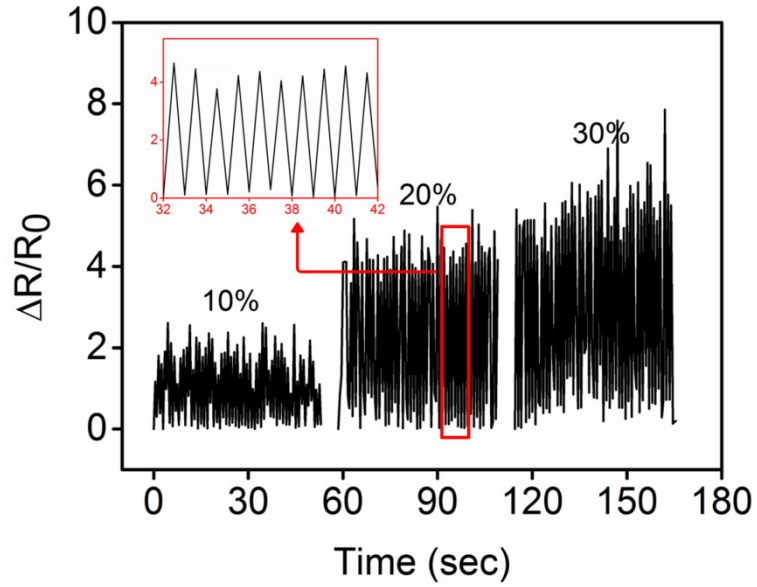

**Fig. S7** The normalized electrical resistance changes ( $\Delta R/R_0$ ) of the e-skin under cyclic mechanical stretching and releasing at the rate of 1 Hz with strain as 10%, 20%, and 30%, respectively.

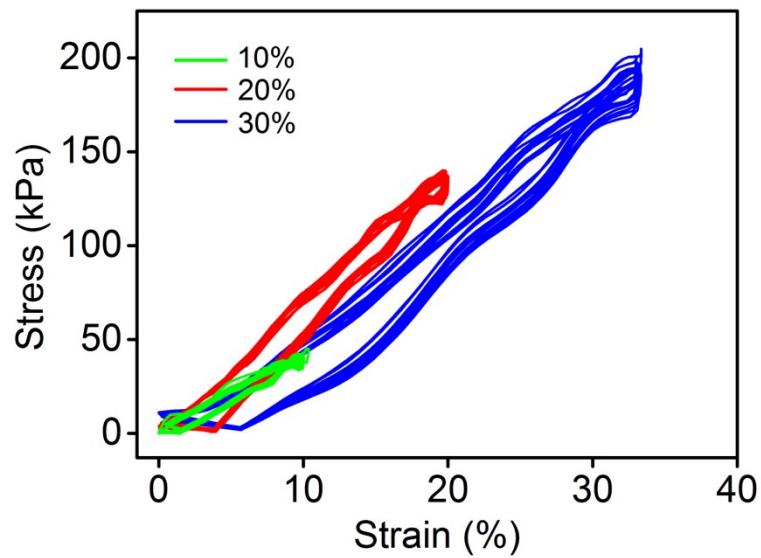

**Fig. S8** The stress-strain curves of e-skin with different mechanical strains.

**Table S1** The response ranges and sensitivity values of e-skins.

| <b>Elements</b>  | <b>Parameter</b>   | <b>Response range</b> | <b>Sensitivity</b> | <b>R<sup>2</sup></b> |
|------------------|--------------------|-----------------------|--------------------|----------------------|
| Bottom radii     | 100 $\mu\text{m}$  | 0-100%                | 0.136              | 0.997                |
|                  | 150 $\mu\text{m}$  | 0-100%                | 0.09               | 0.978                |
|                  | 200 $\mu\text{m}$  | 0-100%                | 0.066              | 0.932                |
|                  | 250 $\mu\text{m}$  | 0-100%                | 0.043              | 0.955                |
|                  | 300 $\mu\text{m}$  | 0-130%                | 0.0159             | 0.99                 |
| Spacing          | 600 $\mu\text{m}$  | 0-90%                 | 0.084              | 0.961                |
|                  | 800 $\mu\text{m}$  | 0-100%                | 0.085              | 0.991                |
|                  | 1000 $\mu\text{m}$ | 0-100%                | 0.136              | 0.997                |
|                  | 1200 $\mu\text{m}$ | 0-100%                | 0.113              | 0.998                |
|                  | 1400 $\mu\text{m}$ | 0-100%                | 0.092              | 0.993                |
| Geometric arrays | hexagon            | 0-100%                | 0.147              | 0.999                |
|                  | square             | 0-100%                | 0.136              | 0.997                |
|                  | central square     | 0-100%                | 0.105              | 0.995                |
|                  | triangle           | 0-100%                | 0.088              | 0.97                 |
